# Supplementary material
Source: PubMed Central journal article supplement (PMC8564860)
Supplement: NIHMS1676053-supplement-Supplemental_Materials_Cappuccio_et_al_2019.pdf [file NIHMS1676053-supplement-Supplemental_Materials_Cappuccio_et_al_2019.pdf]

**Opening a window on lysosomal acid lipase deficiency: new biochemical and molecular insights**

Gerarda Cappuccio<sup>1,2\*</sup>, Taraka R. Donti<sup>1\*#</sup>, Leroy Hubert<sup>1</sup>, Qin Sun<sup>2</sup> and Sarah H. Elsea<sup>2</sup>

<sup>1</sup>Department of Molecular and Human Genetics, Baylor College of Medicine, One Baylor Plaza, Houston, TX, 77030

USA

<sup>2</sup>Department of Translational Medical Sciences, Section of Pediatrics, Federico II University, Naples, Italy

\*These authors contributed equally to the work

#Current address: PerkinElmer Genetics, Pittsburgh, PA 15275

**Supplementary Table 1.** LAL enzyme activity with respect to sample type, age, and gender in fibroblasts, liver specimens, amniocytes, and chorionic villus sampling.

| <b>Sample type</b>                                                                 | <b>Number of patients with LAL-D</b><br>mean age at diagnosis,<br>years±SD | <b>LAL activity value in confirmed LAL-D patients</b><br>mean±SD pmol/min/mg<br>protein |
|------------------------------------------------------------------------------------|----------------------------------------------------------------------------|-----------------------------------------------------------------------------------------|
| <b>WBS (n=625)</b> (normal values >25 pmol/min/mg protein)                         | 37 (23.6±25.4)                                                             | 5.90±4.27                                                                               |
| Age (years±SD)                                                                     | 25.1±22.9                                                                  |                                                                                         |
| Males tested                                                                       | 351                                                                        |                                                                                         |
| Females tested                                                                     | 251                                                                        |                                                                                         |
| Gender unknown tested                                                              | 23                                                                         |                                                                                         |
| <b>Fibroblasts (n=30)</b> (normal range 100-290 pmol/min/mg protein)               | 7 (12.91±14.73)                                                            | 5.74±0.71                                                                               |
| Age (years±SD)                                                                     | 12.94±17.29                                                                |                                                                                         |
| Males tested                                                                       | 13                                                                         |                                                                                         |
| Females tested                                                                     | 2                                                                          |                                                                                         |
| Gender unknown tested                                                              | 15                                                                         |                                                                                         |
| <b>Liver (n=4)</b> (normal range 20-200 pmol/min/mg protein)                       | 0                                                                          | N/A                                                                                     |
| Age (years±SD)                                                                     | 7.06±5.9                                                                   |                                                                                         |
| Males tested                                                                       | 0                                                                          |                                                                                         |
| Females tested                                                                     | 4                                                                          |                                                                                         |
| Gender unknown tested                                                              | 0                                                                          |                                                                                         |
| <b>Amniocytes (n=13)</b> (normal range for fetal cells 40-160 pmol/min/mg protein) | N/A                                                                        | 3 (N/A)                                                                                 |
| <b>CVS (n=9)</b> (normal range for fetal cells 40-160 pmol/min/mg protein)         | N/A                                                                        | 0                                                                                       |
|                                                                                    |                                                                            | N/A                                                                                     |

N/A: Not applicable; WBC: white blood cell, CVS: chorionic villus sampling; LAL: lysosomal acid lipase activity, LAL-D: acid lipase activity deficiency.

**Supplementary Table 2.** The two novel mutations, p.S103R and p.A286P, with *in-silico* predictions of pathogenicity by SIFT (Sorting Intolerant From Tolerant), Polyphen2, LRT (likelihood ratio test), Mutation Taster, and CADD (Combined Annotation Dependent Depletion) are shown. The variants, p.S103R and p.A286P, are not present in 1000Genomes, and the mutation p.A286P is not present in ExAc, while the mutation p.S103R in 1/121,406 alleles ([www.ExAc.broadinstitute.org](http://www.ExAc.broadinstitute.org)).

| Chr            | AA Change                                                                                                              | SIFT score | SIFT pred | Polyphen2 HDIV score | Polyphen2 HDIV pred | LRT pred | Mutation Taster score | Mutation Taster pred | CADD phred |
|----------------|------------------------------------------------------------------------------------------------------------------------|------------|-----------|----------------------|---------------------|----------|-----------------------|----------------------|------------|
| 10:90988076G>T | LIPA:NM_000235:exon4:c.C309A:p.S103R, LIPA:NM_001127605:exon4:c.C309A:p.S103R                                          | 0          | D         | 1.0                  | D                   | D        | 1.000                 | D                    | 18.45      |
| 10:90982306C>G | LIPA:NM_001288979:exon6:c.G508C:p.A170P, LIPA:NM_000235:exon8:c.G856C:p.A286P, LIPA:NM_001127605:exon8:c.G856C:p.A286P | 0.01       | D         | 0.996                | D                   | D        | 1.000                 | D                    | 26.8       |

SIFT scores < 0.05 mutation predicted to be deleterious; PolyPhen-2 scores closer to 1 indicate that the amino acid substitution is deleterious. D: deleterious. Chr: chromosome, AA: amino acid.

**Supplementary Table 3.** All *LIPA* pathogenic variants reported to date. Novel mutations reported in this study are in bold.

|           | Reference                                    | c.DNA                          | Protein                           | exon/intron     |
|-----------|----------------------------------------------|--------------------------------|-----------------------------------|-----------------|
| 1         | Lin et al. 2015                              | c.57_60delTGAG                 |                                   | exon2           |
| 2         | Stein et al., 2007                           | c.67G>A, c.260G>T              | p.Gly23Arg,<br>p.Gly87Val         | exon2,<br>exon4 |
| 3         | Wiebusch et al., 1996                        | c.67G>A, c.894G>A              | p.Gly23Arg,<br>p.Ser275_Gln298del | exon2,<br>exon8 |
| 4         | ExAc (LOF)                                   | c.111+1G>A                     |                                   | intron2         |
| 5         | Fujiyama et al., 1996                        |                                | p.Tyr43Ter                        | exon3           |
| 6         | Lohse et al., 1999                           | c.119_126del                   | p.Tyr43Isofs*6                    | exon3           |
| 7         | Lohse et al., 1999                           | c.120_127delTATCTC<br>TT       | p.Ile41Leufs*5                    | exon3           |
| 8         | ExAc (LOF)                                   |                                | p.Ser42LeufsTer6                  | exon3           |
| 9         | ExAc (LOF)                                   | c.132G>A                       | p.Trp44Ter                        | exon3           |
| 10        | Elleder et al., 1999                         | c.170A>T                       | p.Asp57Val                        | exon3           |
| 11        | Redonnet-Vernhet et al., 1997                | c.193C>T                       | p.Arg65Ter                        | exon3           |
| 12        | Fasano et al., 2012                          | c.229+1G>A                     | IVS3 ds G-A +1                    | intron3         |
| 13        | Pisciotta et al., 2017                       | c.229+3A > C                   |                                   | intron3         |
| 14        | Pisciotta et al., 2009                       | c.230_231ins35;2323_2<br>45del | p.Pro78Alafs*5                    | intron3         |
| 15        | Pagani 1998                                  | c.254A>G                       | p.Gln85Arg                        | exon4           |
| 16        | Santillán-Hernández et al., 2015             | c.253C>A                       | p.Gln85Lys                        | exon4           |
| 17        | CLINVAR (mutations not previously described) | c.253C>T                       | p.Gln85Ter                        | exon4           |
| 18        | Reynders et al., 2016                        | c.256C>T                       | p.His86Tyr                        | exon4           |
| 19        | Pagani 1996                                  | c.260G>T                       | p.Gly87Val                        | exon4           |
| 20        | Elleder et al., 1999                         | c.283T>A                       | p.Trp95Arg                        | exon4           |
| 21        | Santillán-Hernández et al., 2015             | c.294C>G                       | p.Asn98Lys                        | exon4           |
| <b>22</b> | <b>Cappuccio, Donti et al., 2018</b>         | <b>c.309C&gt;A</b>             | <b>p.Ser103Arg</b>                | <b>exon4</b>    |
| 23        | Huang et al., 2012                           | c.317_318insT                  | p.I107Hfs*4                       | exon4           |
| 24        | Anderson et al., 1999                        | c.347G>A                       | p.Trp116Ter                       | exon4           |
| 25        | ExAc (LOF)                                   | c.351delinsCCG                 | p.Met117IlefsTer45                | exon4           |

|    |                        |                |                                             |         |
|----|------------------------|----------------|---------------------------------------------|---------|
| 26 | Hooper et al., 2008    | c.356A>G       | p.Asn119ser                                 | exon4   |
| 27 | Gramatges et al., 2009 | c.361A>G       | p.Arg121Gly                                 | exon4   |
| 28 | Reynders et al., 2016  | c.377C>T       | p.Ser126Phe                                 | exon4   |
| 29 | Ries et al., 1998      | c.386A>C       | p.His129Pro                                 | exon4   |
| 30 | Ries et al., 1998      | c.386A>G       | p.His129Arg                                 | exon4   |
| 31 | Anderson et al., 1999  | c.397_398delTC | p.Val134Phefs*4                             | exon4   |
| 32 | ExAc (LOF)             | c.401delinsGT  | p.Val134GlyfsTer5                           | exon4   |
| 33 | Seedorf et al., 1999   | c.398delC      | p.Ser133Ter                                 | exon4   |
| 34 | Lohse et al., 1999     | c.414dupA      | p.Phe139Isofs*7                             | exon4   |
| 35 | Reynders et al., 2016  | c.417C>A       | p.Phe139Leu                                 | exon4   |
| 36 | Fasano et al., 2012    | c.419G>A       | p.Trp140Ter                                 | exon4   |
| 37 | Maciejko et al., 2017  | c.428+1G>A     | IVS4 ds G-A +1                              | intron4 |
| 38 | Elleder et al., 1999   | c.435T>A       | p.Asp145Glu                                 | exon5   |
| 39 | Lee et al., 2011       | c.482delA      | p.Asn161Iifs*18                             | exon5   |
| 40 | ExAc (LOF)             |                | p.Asn161IlefsTer19                          | exon5   |
| 41 | Chora et al., 2017     | c.528C>T       | p.Gly176Gly                                 | exon5   |
| 42 | Reynders et al., 2016  | c.526G>A       | p.Gly176Ser                                 | exon5   |
| 43 | Reynders et al., 2016  | c.538+5G>A     | IVS5 ds G-A +5                              | intron5 |
| 44 | Chora et al., 2017     | c.538+6T>C     | IVS5 ds T-C +6                              | intron5 |
| 45 | ExAc (LOF)             | c.565G>T       | p.Glu189Ter                                 | exon6   |
| 46 | Anderson et al., 1994  | c.594dupT      | p.Ala199Cysfs*13                            | exon6   |
| 47 | Malsen et al., 1993    | c.599T>C       | p.Leu200Pro                                 | exon6   |
| 48 | Klima et al., 1993     |                | p.Leu200Pro,<br>p.Phe208Leu,<br>p.Gly266Ter | exon6-7 |
| 49 | Pagani 1996            | c.605C>T       | p.Pro202Leu                                 | exon6   |
| 50 | Kuranobu et al., 2015  | c.607G>C       | p.Val203Leu                                 | exon6   |
| 51 | Elleder et al., 2000   | c.635delC      | p.Pro212Leufs*5                             | exon6   |
| 52 | Pisciotta et al., 2009 | c.652C>T       | p.Arg218Ter                                 | exon6   |
| 53 | Chora et al., 2017     | c.676-23T>C    | IVS6 as T-C -23                             | intron6 |
| 54 | Pagani et al., 1996    | c.676-2A>G     | IVS6 as A-G -2                              | intron6 |
| 55 | ExAc (LOF)             | c.676-2A>T     |                                             | intron6 |

|           |                                     |                    |                    |              |
|-----------|-------------------------------------|--------------------|--------------------|--------------|
| 56        | Anderson et al., 1999               | c.684delT          | p.Phe228Leufs*13   | exon7        |
| 57        | Krivit et al., 2000                 | c.724delT          | Trp242Glyfs*12     | exon7        |
| 58        | Kuranobu et al., 2015               | c.791T>C           | p.Leu264Pro        | exon7        |
| 59        | Aslanidis et al., 1996              | c.796G>T           | p.Gly266Ter        | exon7        |
| 60        | Kojima et al., 2013                 |                    | p.Asn271His        | exon7        |
| 61        | Yang et al., 2009                   | c.822+1G>A         | IVS7 ds G-A +1     | intron7      |
| 62        | Reynders et al., 2016               | c.822+1G>C         | IVS7 ds G-C +1     | intron7      |
| 63        | Ghosh et al., 2017                  | c.824C>T           | p.Ser275Phe        | exon8        |
| 64        | Chora et al., 2017                  | c.846A>G           | p.Thr282Thr        | exon8        |
| 65        | Pagani 1998                         | c.863C>T           | p.Thr288Ile        | exon8        |
| <b>66</b> | <b>Cappuccio, Donti et al. 2018</b> | <b>c.856G&gt;C</b> | <b>p.Ala286Pro</b> | <b>exon8</b> |
| 67        | Anderson et al., 1999               | c.866C>G           | p.Ser289Cys        | exon8        |
| 68        | Pagani et al., 1996                 | c.881T>C           | p.Leu294Ser        | exon8        |
| 69        | Pagani et al., 1994                 | c.883C>T           | p.His295Tyr        | exon8        |
| 70        | Chora et al., 2017                  | c.891C>T           | p.Ser297Ser        | exon8        |
| 71        | Gómez-Nájera et al., 2015           | c.894G>C           | p.Gln298His        | exon8        |
| 72        | Klima et al., 1993                  | c.894G>A           | IVS8 ds G-A -1     | exon8        |
| 73        | Ries et al., 1996                   | c.892C>T           | p.Gln298Ter        | exon8        |
| 74        | Aslanidis et al., 1996              | c.894+1G>A         | IVS8 ds G-A +1     | intron8      |
| 75        | ExAc (LOF)                          |                    | p.Val300AsnfsTer30 | exon9        |
| 76        | Reynders et al., 2016               | c.931G>A           | p.Gly311Arg        | exon9        |
| 77        | ExAc (LOF)                          |                    | p.Tyr317Ter        | exon9        |
| 78        | Sjouke et al., 2016                 | c.966+3A>T         | IVS9 ds A-T +3     | intron9      |
| 79        | Seedorf 1999                        |                    | p.Tyr324Ter        | exon10       |
| 80        | Ameis et al., 1995                  | c.967_968delAG     | p.Ser323Leufs*44   | exon10       |
| 81        | Reynders et al., 2016               | c.974C>T           | p.Pro325Leu        | exon10       |
| 82        | Anderson et al., 1999               | c.980delC          | p.Thr327Asnfs*4    | exon10       |
| 83        | Anderson et al., 1999               | c.1024G>A          | p.Gly342Arg        | exon10       |
| 84        | Lohse et al., 1999                  | c.1024G>T          | p.Gly342Trp        | exon10       |
| 85        | Lohse et al., 2000                  | c.1028delG         | p.Gly343Valfs*15   | exon10       |
| 86        | Pisciotta et al., 2017              | c.1033G > A        | p.Asp345Asn        | exon10       |

|    |                             |                                    |                    |        |
|----|-----------------------------|------------------------------------|--------------------|--------|
| 87 | Sjouke et al., 2015         | c.1067T>G                          | p. Leu356Ter       | exon10 |
| 88 | Seedorf 1999                | c.1070T>C                          | p.Leu357Pro        | exon10 |
| 89 | ExAc (LOF)                  |                                    | p.Pro370ArgfsTer25 | exon10 |
| 90 | Chora et al., 2017          | c.1113A>G                          | p. Glu371Glu       | exon10 |
| 91 | Chora et al., 2017          | c.1188G>A                          | p.Arg396Arg        | exon10 |
|    | <b>Gross rearrangements</b> |                                    |                    |        |
| 1  | Lee et al., 2011            | at least part of ex. 4             |                    |        |
| 2  | Ghosh et al., 2017          | entire <i>LIPA</i> gene            |                    |        |
| 3  | Anderson et al., 1999       | <i>LIPA</i> ex. 4                  | r.230_428del       |        |
| 4  | Pullinger et al., 2015      | incl. <i>LIPA</i> ex. 4            |                    |        |
| 5  | Ries et al., 1998           | <i>LIPA</i> intr. 1 to ex. 4       |                    |        |
| 6  | Lee et al., 2011            | <i>LIPA</i> 5'Ex 4 del             |                    |        |
| 7  | Pisciotta et al., 2009      | c.229-33_c.230dup,<br>c.232_245del | p.Gly77fs*5        |        |
| 8  | Ries et al., 1998           | c.64-?_428+?del                    | exon2_4 del        |        |
